# Supplementary material
Source: publisher figshare collection journal article supplement (https://frontiersin.figshare.com/ndownloader/files/26200265)
Supplement: Supplementary file 1 [file 26200265]

**Validation of the use of spectrophotometry in the determination of Diquat and Paraquat dissolved in water**

The determination of the DQ and PQ contractions in water (supernatant) was carried out, using a calibration curve of eight levels of known concentrations; 0.0001 mM, 0.005 mM, 0.010 mM, 0.050 mM, 0.075 mM, 0.100 mM, 0.150 mM, 0.200 mM.

The samples were prepared in a falcon tube with 16 g of silica sand; adding a known concentration of the aforementioned herbicides, which was adjusted to pH 6-7.

By carring out these measurements, performance parameters such as: linearity, precision and accuracy of the spectrophotometric method can be obtained.

It is important to affirm that the validation of these parameters served to support the reliability and certainty of the data obtained; Due to the fact that the technique used in this project, UV-Visible Spectrophotometry, is a simpler technique for the preparation and analysis of samples and more economically accessible.

- **Diquat (DQ)**

**
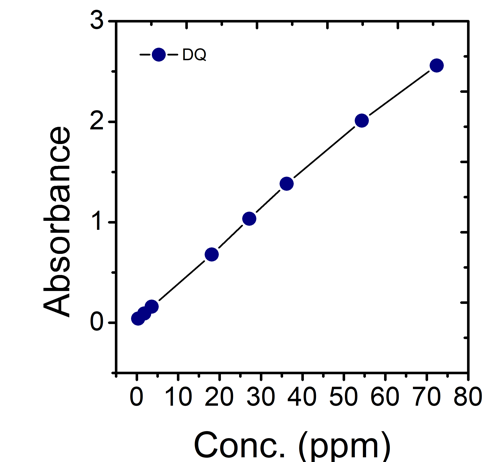
**

| **Linear Method** | | |
| --- | --- | --- |
| Known Concentration | Absorbance Obtained | Concentration  Obtained |
| 0.001 mM | 0.041 | 0.001 mM |
| 0.005 mM | 0.070 | 0.005 mM |
| 0.010 mM | 0.159 | 0.010 mM |
| 0.050 mM | 0.678 | 0.051 mM |
| 0.075 mM | 1.034 | 0.078 mM |
| 0.100 mM | 1.382 | 0.105 mM |
| 0.150 mM | 2.011 | 0.152 mM |
| 0.200 mM | 2.560 | 0.194 mM |
| **r2= 0,998 A= 0.001 B=0.982** | | |
| Criteria of acceptance: r2≥ 0,98 A= 0 y B= 1,0 | | |

| **Method Precision** |
| --- |
| 0.0997 mM |
| 0.0997 mM |
| 0.0997 mM |
| 0.0997 mM |
| 0.0997 mM |
| **x = 0.0997 mM** |
| **σx= 0.0001** |
| **CV= 0.02 %** |
| Criteria of acceptance: CV ≤ 2% |

| **Method accuracy**  **(Sample concentration 0.100 mM)** | | |
| --- | --- | --- |
| Abs.  Obtained  Sample | Conc. obtained  Sample | % Recovery |
| 1.3170 | 0.099 mM | 99.73 |
| 1.3164 | 0.099 mM | 99.69 |
| 1.3164 | 0.099 mM | 99.69 |
| 1.3162 | 0.099 mM | 99.67 |
| 1.3162 | 0.099 mM | 99.67 |
|  |  | x = 99.69 |
|  |  | σx= 0.022 |
|  |  | CV= 0.02% |

Acceptance criteria CV ≤ 2%.

Recovery range 102.00% to 98.00%.

Partial validation of the spectrophotometric method for the DQ is acceptable in terms of accuracy and precision. The results obtained with the calibration curve will be adjusted and accurate.

- **Paraquat (PQ)**

**
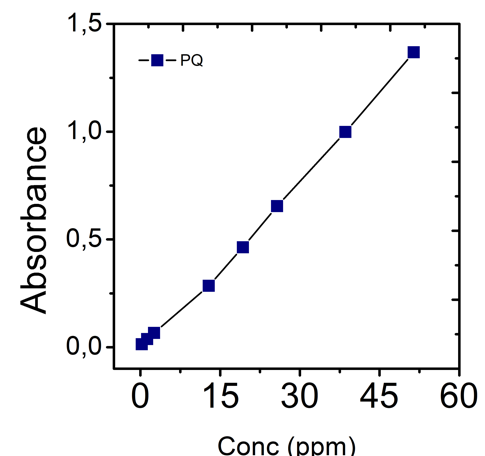
**

| **Linear Method** | | | |
| --- | --- | --- | --- |
| Known Concentration | Known Concentration | Known Concentration | |
| 0.001 mM | 0.007 | 0.001 mM | |
| 0.005 mM | 0.036 | 0.005 mM | |
| 0.010 mM | 0.072 | 0.010 mM | |
| 0.050 mM | 0.363 | 0.050 mM | |
| 0.075 mM | 0.548 | 0.074 mM | |
| 0.100 mM | 0.729 | 0.099 mM | |
| 0.150 mM | 1.105 | 0.150 mM | |
| 0.200 mM | 1.485 | 0.201 mM | |
| **r2= 0.999 A= -0.0006 B=1.004** | | | |
| Criteria of acceptance: r2≥ 0,98 A= 0 y B= 1,0 | | |

| **Method Precision** |
| --- |
| 0.0808 mM |
| 0.0808 mM |
| 0.0807 mM |
| 0.0806 mM |
| 0.0806 mM |
| **x = 0.0807 mM** |
| **σx= 0.0001** |
| **CV= 0.07 %** |
| Criteria of acceptance: CV ≤ 2% |

| **Method accuracy**  **(Sample concentration 0.080 mM)** | | |
| --- | --- | --- |
| Abs.  Obtained  Sample | Abs.  Obtained  Sample | Abs.  Obtained  Sample |
| 0.5959 | 0.081 mM | 100.96 |
| 0.5959 | 0.081 mM | 100.96 |
| 0.5951 | 0.081 mM | 100.81 |
| 0.5950 | 0.081 mM | 100.81 |
| 0.5950 | 0.081 mM | 100.81 |
|  |  | x = 100.87% |
|  |  | σx= 0.072 |
|  |  | CV= 0.07% |

Acceptance criteria CV ≤ 2%.

Recovery range 102.00% to 98.00%.

Partial validation of the spectrophotometric method for the PQ is acceptable in terms of accuracy and precision. The results obtained with the calibration curve have been adjusted and are accurate.
